# Supplementary material
Source: PubMed Central journal article supplement (PMC1304048)
Supplement: biophysj_86_4_1904__1.pdf [file biophysj_86_4_1904__1.pdf]

**Figure S1:** The sequences (43 Blast entries shown) used to generate the multiple sequence alignment with bovine rhodopsin.

|    |        |            |                                                  |     |       |
|----|--------|------------|--------------------------------------------------|-----|-------|
| sp | P28682 | OPSB_CHICK | Blue-sensitive opsin (Blue cone photorecept...   | 357 | 2e-98 |
| sp | P51472 | OPSB_ASTFA | BLUE-SENSITIVE OPSIN (BLUE CONE PHOTORECEPT...   | 347 | 2e-95 |
| sp | P32310 | OPSB_CARAU | Blue-sensitive opsin (Blue cone photorecept...   | 337 | 2e-92 |
| sp | P87365 | OPSB_ORYLA | BLUE-SENSITIVE OPSIN (BLUE CONE PHOTORECEPT...   | 330 | 2e-90 |
| sp | Q9W6A8 | OPSB_BRARE | Blue-sensitive opsin (Blue cone photorecept...   | 324 | 2e-88 |
| sp | P51473 | OPSV_XENLA | Violet-sensitive opsin (Violet cone photore...   | 307 | 2e-83 |
| sp | P51475 | OPSP_CHICK | Pinopsin (Pineal opsin) (P-opsin) (Pineal g...   | 302 | 6e-82 |
| sp | P28684 | OPSV_CHICK | Violet-sensitive opsin (Violet cone photore...   | 300 | 2e-81 |
| sp | P51476 | OPSP_COLLI | PINEAL OPSIN (P-OPSIN) (PINEAL GLAND-SPECIF...   | 295 | 1e-79 |
| sp | O13092 | OPSB_SAIBB | Blue-sensitive opsin (Blue cone photorecept...   | 290 | 3e-78 |
| sp | P51491 | OPSB_MOUSE | Blue-sensitive opsin (Blue cone photorecept...   | 290 | 4e-78 |
| sp | Q90309 | OPSU_CARAU | ULTRAVIOLET-SENSITIVE OPSIN (ULTRAVIOLET CO...   | 287 | 2e-77 |
| sp | P03999 | OPSB_HUMAN | Blue-sensitive opsin (Blue cone photorecept...   | 285 | 1e-76 |
| sp | Q9W6A9 | OPSU_BRARE | Ultraviolet-sensitive opsin (Ultraviolet co...   | 283 | 3e-76 |
| sp | Q63652 | OPSB_RAT   | Blue-sensitive opsin (Blue cone photoreceptor... | 283 | 5e-76 |
| sp | P51490 | OPSB_BOVIN | Blue-sensitive opsin (Blue cone photorecept...   | 277 | 3e-74 |
| sp | P87368 | OPSV_ORYLA | PUTATIVE VIOLET-SENSITIVE OPSIN (VIOLET CON...   | 276 | 4e-74 |
| sp | O42490 | OPSP_PETMA | PINEAL OPSIN (P-OPSIN) (PINEAL GLAND-SPECIF...   | 273 | 3e-73 |
| sp | P04001 | OPSG_HUMAN | Green-sensitive opsin (Green cone photorece...   | 269 | 5e-72 |
| sp | Q95170 | OPSR_CAPHI | Red-sensitive opsin (Red cone photoreceptor...   | 268 | 2e-71 |
| sp | O18913 | OPSR_FELCA | Red-sensitive opsin (Red cone photoreceptor...   | 267 | 3e-71 |
| sp | P35358 | OPSG_GECGE | Green-sensitive opsin P521 (Green photorece...   | 266 | 4e-71 |
| sp | P87367 | OPSR_ORYLA | RED-SENSITIVE OPSIN (RED CONE PHOTORECEPTOR...   | 266 | 6e-71 |
| sp | O18910 | OPSG_RABIT | Green-sensitive opsin (Green cone photorece...   | 265 | 8e-71 |
| sp | P04000 | OPSR_HUMAN | Red-sensitive opsin (Red cone photoreceptor...   | 265 | 1e-70 |
| sp | O35476 | OPSG_RAT   | Green-sensitive opsin (Green cone photorecept... | 264 | 2e-70 |
| sp | P34989 | OPSL_CALJA | Opsin, longwave 563 nm                           | 263 | 3e-70 |
| sp | Q9W6A7 | OPSR_BRARE | Red-sensitive opsin (Red cone photoreceptor...   | 263 | 4e-70 |
| sp | O35478 | OPSG_SCICA | Green-sensitive opsin (Green cone photorece...   | 262 | 8e-70 |
| sp | Q9R024 | OPSG_CAVPO | Green-sensitive opsin (Green cone photorece...   | 262 | 8e-70 |
| sp | O35599 | OPSG_MOUSE | Green-sensitive opsin (Green cone photorece...   | 261 | 1e-69 |
| sp | P32313 | OPSR_CARAU | Red-sensitive opsin (Red cone photoreceptor...   | 259 | 7e-69 |
| sp | P22332 | OPSR_ASTFA | RED-SENSITIVE OPSIN (RED CONE PHOTORECEPTOR...   | 258 | 9e-69 |
| sp | P41592 | OPSR_ANOCA | Red-sensitive opsin (Red cone photoreceptor...   | 258 | 2e-68 |
| sp | O12948 | OPSR_XENLA | RED-SENSITIVE OPSIN (RED CONE PHOTORECEPTOR...   | 257 | 2e-68 |
| sp | P22329 | OPSR_CHICK | Red-sensitive opsin (Red cone photoreceptor...   | 253 | 3e-67 |
| sp | P22330 | OPSG_ASTFA | Green-sensitive opsin 1 (Green cone photore...   | 246 | 6e-65 |
| sp | P22331 | OPSH_ASTFA | Green-sensitive opsin 2 (Green cone photore...   | 244 | 1e-64 |
| sp | O42266 | OPSP ICTPU | PARAPINOPSIN                                     | 229 | 6e-60 |
| sp | O18912 | OPSR_HORSE | Red-sensitive opsin (Red cone photoreceptor...   | 222 | 7e-58 |
| sp | O18911 | OPSG_ODOVI | Green-sensitive opsin (Green cone photorece...   | 222 | 7e-58 |
| sp | O18914 | OPSR_CANFA | Red-sensitive opsin (Red cone photoreceptor...   | 218 | 1e-56 |
| sp | O13018 | OPSO_SALSA | Vertebrate ancient opsin                         | 218 | 2e-56 |
