# Supplementary material
Source: PubMed Central journal article supplement (PMC1304048)
Supplement: biophysj_86_4_1904__2.pdf [file biophysj_86_4_1904__2.pdf]

**Table S1:** Residues within a 5 Å shell (of retinal without Schiff base bond formed) which interact more favorably than an interaction energy of –1 kcal/mol with the ligand are shown in order of decreasing interaction. The interaction energy values are shown in parentheses.

| NoSB-<br>Ret(HD)/closed(xtal) | NoSB-Ret(HD)/<br>closed (MS) | NoSB-<br>Ret(HD)/open(MS) |
|-------------------------------|------------------------------|---------------------------|
| Thr118 (-4.6)                 | Lys296 (-9.6)                | Lys296 (-7.3)             |
| Tyr268 (-3.9)                 | Glu122 (-3.0)                | Tyr268 (-3.4)             |
| Lys296 (-2.6)                 | Tyr268 (-2.6)                | Glu122 (-2.9)             |
| Hsp211 (-1.8)                 | Ala117 (-1.9)                | Ala272 (-2.7)             |
| Glu122 (-1.4)                 | Thr118 (-1.9)                | Ile275 (-2.5)             |
| Phe208 (-1.4)                 | Ile275 (-1.6)                | Ala117 (-2.2)             |
| Met207 (-1.2)                 | Met207 (-1.1)                | Val271 (-1.9)             |
|                               | Phe212 (-1.0)                | Met207 (-1.4)             |
|                               |                              | Phe208 (-1.3)             |
|                               |                              | Phe276 (-1.1)             |
