# Supplementary material
Source: PubMed Central journal article supplement (PMC1304048)
Supplement: biophysj_86_4_1904__3.pdf [file biophysj_86_4_1904__3.pdf]

**Table S2:** Residues within a 5 Å shell (of retinal with Schiff base bond formed) which interact more favorably than an interaction energy of –1 kcal/mol with the ligand are shown in order of decreasing interaction. The interaction energy values are shown in parentheses.

| Ret(xtal)/closed(xtal) | Ret(HD)/closed(xtal) | Ret(HD)/closed(MS) |
|------------------------|----------------------|--------------------|
| Glu122 (-21.9)         | Glu122 (-19.8)       | Glu122 (-18.2)     |
| Glu113 (-20.3)         | Glu113 (-18.0)       | Thr118 (-4.0)      |
| Glu181 (-18.0)         | Glu181 (-14.9)       | Tyr268 (-4.0)      |
| Trp265 (-6.5)          | Trp265 (-6.8)        | Phe208 (-3.2)      |
| Tyr268 (-4.8)          | Thr118 (-5.2)        | Met207 (-1.2)      |
| Thr118 (-3.9)          | Tyr268 (-5.2)        | Trp265 (-1.1)      |
| Ala292 (-2.9)          | Met207 (-2.7)        | Gly114 (-1.1)      |
| Ala117 (-2.3)          | Ala292 (-2.3)        | Ala269 (-1.1)      |
| Phe208 (-2.0)          | Phe212 (-1.9)        | Phe212 (-1.0)      |
| His211 (-1.8)          | Phe208 (-1.8)        | Ile275 (-1.0)      |
| Phe212 (-1.7)          | Gly114 (-1.8)        |                    |
| Gly114 (-1.6)          | Cys187 (-1.3)        |                    |
| Met207 (-1.6)          | Phe261 (-1.2)        |                    |
| Phe261 (-1.4)          | Ala269 (-1.2)        |                    |
| Phe293 (-1.1)          |                      |                    |
